# Supplementary material for: Attitudes and Behaviors toward the Use of Public and Private Green Space during the COVID-19 Pandemic in Iran
Source: MDPI journal article supplement (doi:10.3390/land10101085), 2021-10-14
Supplement: s1 [file s1]

## Supplementary materials

Table S1. Area of different urban green space typologies in Birjand city.

| Typology of urban greenery                             | Area (ha) |
|--------------------------------------------------------|-----------|
| Public parks (No. 87)                                  | 80.62     |
| Street green space (boulevard, square, roadside)       | 92        |
| Planted forest                                         | 61        |
| Green belt                                             | 19.38     |
| Total greenery under the supervision of Municipality   | 253       |
| Private gardens                                        | 186.65    |
| Per Capita Public Urban Parks (m <sup>2</sup> /capita) | 4.33      |
| Per Capita Urban Green Spaces (m <sup>2</sup> /capita) | 13.75     |

Source: Official website of the Organization of Birjand's Urban Parks & Green Spaces (<http://birjandpark.ir/>).

Table S2. Number and area of urban parks by districts.

|            | Urban parks                         |           |                                       |           |                            |           |                        |           | Total Area<br>(ha) |
|------------|-------------------------------------|-----------|---------------------------------------|-----------|----------------------------|-----------|------------------------|-----------|--------------------|
|            | Mini Parks<br>(less than 0.5<br>ha) |           | Neighborhood<br>Parks<br>(0.5 – 2 ha) |           | District Parks<br>(2-4 ha) |           | City Parks<br>(4-8 ha) |           |                    |
|            | N                                   | Area (ha) | N                                     | Area (ha) | N                          | Area (ha) | N                      | Area (ha) |                    |
| District 1 | 10                                  | 2.24      | 5                                     | 3.42      | 5                          | 12.14     | 2                      | 15.21     | 33                 |
| District 2 | 42                                  | 9.65      | 18                                    | 17.95     | 4                          | 13.22     | 1                      | 6.8       | 47.62              |
| Total      | 52                                  | 11.89     | 23                                    | 21.37     | 9                          | 25.36     | 3                      | 22        | 80.62              |

Source: Official website of the Organization of Birjand's Urban Parks & Green Spaces (<http://birjandpark.ir/>).

Table S3. Greenery class, price of land and preference for residency for the Birjand neighborhoods where respondents live.

| District | Neighborhoods | Classes of greenery per capita | Classes for price of urban lands | Classes for preferred for residency |
|----------|---------------|--------------------------------|----------------------------------|-------------------------------------|
| 2        | 1             | 8                              | 5                                | 5                                   |
| 1        | 2             | 8                              | 6                                | 6                                   |
| 1        | 3             | 7                              | 6                                | 6                                   |
| 1        | 4             | 7                              | 6                                | 6                                   |
| 1        | 5             | 8                              | 6                                | 6                                   |
| 1        | 6             | 8                              | 6                                | 6                                   |
| 1        | 7             | 7                              | 5                                | 4                                   |
| 1        | 8             | 7                              | 5                                | 4                                   |
| 1        | 9             | 7                              | 5                                | 4                                   |
| 1        | 10            | 8                              | 5                                | 4                                   |
| 1        | 11            | 7                              | 5                                | 4                                   |
| 1        | 12            | 7                              | 5                                | 4                                   |
| 1        | 13            | 7                              | 5                                | 4                                   |
| 1        | 14            | 6                              | 4                                | 5                                   |
| 1        | 15            | 6                              | 4                                | 5                                   |
| 1        | 16            | 7                              | 4                                | 5                                   |

|   |    |   |         |         |
|---|----|---|---------|---------|
| 1 | 17 | 8 | 4       | 5       |
| 1 | 18 | 8 | 4       | 5       |
| 1 | 19 | 7 | 4       | 5       |
| 1 | 20 | 8 | 4       | 5       |
| 1 | 21 | 2 | 4       | 5       |
| 1 | 22 | 4 | 4       | 5       |
| 1 | 23 | 8 | no data | no data |
| 1 | 24 | 8 | no data | no data |
| 1 | 25 | 5 | 7       | 6       |
| 2 | 26 | 1 | 7       | 6       |
| 2 | 27 | 7 | 3       | 3       |
| 2 | 28 | 4 | 3       | 2       |
| 2 | 29 | 7 | 2       | 2       |
| 2 | 30 | 8 | 2       | 2       |
| 2 | 31 | 7 | 3       | 3       |
| 2 | 32 | 7 | 2       | 3       |
| 2 | 33 | 7 | 2       | 2       |
| 2 | 34 | 7 | no data | no data |
| 2 | 35 | 7 | 3       | 3       |
| 2 | 36 | 7 | 3       | 3       |
| 2 | 37 | 7 | 1       | 1       |
| 2 | 38 | 7 | 3       | 3       |
| 2 | 39 | 7 | 3       | 3       |
| 2 | 40 | 7 | 3       | 3       |
| 2 | 41 | 7 | 1       | 1       |
| 2 | 42 | 7 | 1       | 1       |
| 2 | 43 | 7 | 1       | 1       |
| 2 | 44 | 7 | 1       | 1       |
| 2 | 45 | 8 | 1       | 1       |
| 2 | 46 | 6 | 1       | 1       |
| 2 | 47 | 6 | 1       | 1       |
| 2 | 48 | 6 | 1       | 1       |
| 2 | 49 | 6 | 1       | 1       |
| 2 | 50 | 7 | 1       | 1       |
| 2 | 51 | 7 | 1       | 1       |
| 2 | 52 | 3 | 1       | 1       |
| 2 | 53 | 5 | 1       | 1       |
| 2 | 54 | 6 | 1       | 1       |
| 2 | 55 | 6 | 1       | 1       |
| 2 | 56 | 5 | 1       | 1       |
| 2 | 57 | 6 | 1       | 1       |

---

Classes of greenery per capita, from 1 (61 to 70 m<sup>2</sup>) to 8 (1-10 m<sup>2</sup>); Price of urban lands from 1 (most expensive) to 7 (cheapest); Preferred for residency from 1 (most preferred) to 6 (least preferred).

Table S4. Descriptive statistics of the sample.

| Age                             | Female |            | Male  |            | Total |            |
|---------------------------------|--------|------------|-------|------------|-------|------------|
|                                 | Count  | Percentage | Count | Percentage | Count | Percentage |
| Less than 20                    | 5      | 2%         | 7     | 5%         | 12    | 3%         |
| Between 20 and 29               | 87     | 36%        | 22    | 14%        | 109   | 28%        |
| Between 30 and 39               | 83     | 35%        | 46    | 30%        | 129   | 33%        |
| Between 40 and 49               | 45     | 19%        | 49    | 32%        | 94    | 24%        |
| Between 50 and 59               | 13     | 5%         | 24    | 15%        | 37    | 9%         |
| Between 60 and 69               | 6      | 3%         | 4     | 3%         | 10    | 3%         |
| More than 70                    | 0      | 0%         | 3     | 2%         | 3     | 1%         |
| Total                           | 239    | 100%       | 155   | 100%       | 394   | 100%       |
| Education                       |        |            |       |            |       |            |
| Post-graduate degree            | 86     | 36%        | 87    | 56%        | 173   | 44%        |
| University/college degree       | 128    | 54%        | 58    | 37%        | 186   | 47%        |
| High school diploma             | 24     | 10%        | 5     | 3%         | 29    | 7%         |
| Mandatory education             | 1      | 0%         | 5     | 3%         | 6     | 2%         |
| Total                           | 239    | 100%       | 155   | 100%       | 394   | 201%       |
| Occupation                      |        |            |       |            |       |            |
| Employee<br>(public/private)    | 82     | 34%        | 97    | 63%        | 179   | 45%        |
| Free-lance, private<br>business | 17     | 7%         | 22    | 14%        | 39    | 10%        |
| Housewife                       | 51     | 21%        |       | 0%         | 51    | 13%        |
| Student                         | 70     | 29%        | 14    | 9%         | 84    | 21%        |
| Unemployed                      | 6      | 3%         | 2     | 1%         | 8     | 2%         |
| Retired                         | 8      | 3%         | 12    | 8%         | 20    | 5%         |
| Other                           | 5      | 2%         | 8     | 5%         | 13    | 3%         |
| Total                           | 239    | 37%        | 155   | 23%        | 394   | 32%        |

Table S5. Users of private green space per size of space and house typology.

|                                   | Total |            | Flat in condominium |            | Single house |            |
|-----------------------------------|-------|------------|---------------------|------------|--------------|------------|
|                                   | N     | Percentage | N                   | Percentage | N            | Percentage |
| More than 100 m <sup>2</sup>      | 40    | 10%        | 10                  | 5%         | 30           | 17%        |
| Between 30 and 100 m <sup>2</sup> | 107   | 27%        | 23                  | 10%        | 84           | 48%        |
| Less than 30 m <sup>2</sup>       | 62    | 16%        | 21                  | 10%        | 41           | 23%        |
| None                              | 185   | 47%        | 164                 | 75%        | 21           | 12%        |
| Total                             | 394   | 100%       | 218 (55%)           | 100%       | 176 (45%)    | 100%       |

Table S6. Type of public green space within 300 m from home without/with presence of private green space.

|                                | Home without a<br>private green space |            | Home with a private<br>green space |            | Total |            |
|--------------------------------|---------------------------------------|------------|------------------------------------|------------|-------|------------|
|                                | N                                     | Percentage | N                                  | Percentage | N     | Percentage |
| None                           | 27                                    | 10%        | 16                                 | 4%         | 42    | 8%         |
| Playground                     | 28                                    | 10%        | 43                                 | 11%        | 39    | 7%         |
| An urban park                  | 110                                   | 40%        | 140                                | 37%        | 223   | 42%        |
| A tree-lined street            | 33                                    | 12%        | 40                                 | 10%        | 73    | 14%        |
| Neighborhood green<br>space    | 32                                    | 12%        | 54                                 | 14%        | 58    | 11%        |
| A public urban garden          | 12                                    | 4%         | 18                                 | 5%         | 22    | 4%         |
| A square with trees            | 18                                    | 7%         | 28                                 | 7%         | 37    | 7%         |
| Green area outside the<br>town | 0                                     | 0%         | 9                                  | 2%         | 5     | 1%         |

|        |     |      |     |      |     |      |
|--------|-----|------|-----|------|-----|------|
| Other  | 15  | 5%   | 34  | 9%   | 32  | 6%   |
| Totals | 275 | 100% | 382 | 100% | 531 | 100% |

Table S7. Characteristics of visitation of public green spaces before the pandemic by users of public green spaces (n=379).

|                                                       | Public green spaces |            | Private green spaces |            |     |
|-------------------------------------------------------|---------------------|------------|----------------------|------------|-----|
| 1) Distance to reach the public green space           | N                   | Percentage | N                    | Percentage |     |
| More than 1 km                                        | 98                  | 26%        |                      |            |     |
| More than 500 m                                       | 53                  | 14%        |                      |            |     |
| Between 300 and 500 m                                 | 100                 | 26%        |                      |            |     |
| Less than 300 m                                       | 128                 | 34%        |                      |            |     |
| Total                                                 | 379                 | 100%       |                      |            |     |
| 2) Type of public green space                         | N                   | Percentage |                      |            |     |
| Playground                                            | 4                   | 1%         |                      |            |     |
| An urban park                                         | 209                 | 55%        |                      |            |     |
| A tree-lined street                                   | 28                  | 7%         |                      |            |     |
| Periurban green spaces                                | 33                  | 9%         |                      |            |     |
| Mountains around city                                 | 75                  | 20%        |                      |            |     |
| Neighborhood green pocket                             | 23                  | 6%         |                      |            |     |
| A public garden                                       | 7                   | 2%         |                      |            |     |
| Total                                                 | 379                 | 100%       |                      |            |     |
| 3) Frequency of visitation of a green space           | N                   | Percentage | N                    | Percentage | P   |
| Every day                                             | 33                  | 8%         | 58                   | 28%        | *** |
| More than once a week                                 | 97                  | 25%        | 50                   | 24%        | ns  |
| Several times a month                                 | 117                 | 30%        | 45                   | 22%        | ns  |
| Once a month                                          | 74                  | 19%        | 18                   | 9%         | **  |
| Less than once a month                                | 58                  | 15%        | 31                   | 15%        | ns  |
| Never                                                 | 15                  | 4%         | 7                    | 3%         | ns  |
| Total                                                 | 394                 | 100%       | 209                  | 100%       | ns  |
| 4) Motivation to visit a green space (max. 2 choices) | N                   | Percentage | N                    | Percentage | p   |
| Gardening                                             | 3                   | 0%         | 47                   | 13%        | *** |
| Meeting people                                        | 34                  | 5%         | 2                    | 1%         | *** |
| Observing nature                                      | 110                 | 17%        | 48                   | 13%        | ns  |
| Passing through it                                    | 35                  | 5%         | 44                   | 12%        | *** |
| Physical exercise (e.g. running, sport)               | 31                  | 5%         | 14                   | 4%         | ns  |
| Reading                                               | 3                   | 0%         | 12                   | 3%         | *** |
| Relaxing                                              | 52                  | 8%         | 67                   | 19%        | *** |
| Staying outdoors                                      | 32                  | 5%         | 75                   | 21%        | *** |
| Taking the kids outdoor                               | 185                 | 28%        | 40                   | 11%        | *** |
| Walking                                               | 175                 | 27%        | 13                   | 4%         | *** |
| Total                                                 | 660                 | 100%       | 362                  | 100%       |     |

The Chi Square goodness of fit test was used to compare the items between the two groups at  $p < 0.05$ . Significant differences are showed with \* at  $p < 0.05$ ; \*\* at  $p < 0.01$ ; \*\*\* at  $p < 0.001$ ; ns for non-significant differences.

Table S8. Difference in frequency (1), motivation (2) of visitation and benefits and services perception (3) regarding public green spaces by respondents without (No) and with (Yes) access to a private green space (pre and during the pandemic)

|                                                           | Private Green Space = No |            |                 | Private Green Space = Yes |            |                 | Private green space |
|-----------------------------------------------------------|--------------------------|------------|-----------------|---------------------------|------------|-----------------|---------------------|
|                                                           | N                        | Percentage | pre- vs. during | N                         | Percentage | pre- vs. during | No vs. Yes          |
| <b>1) Frequency of visitation of a public green space</b> |                          |            |                 |                           |            |                 |                     |
| <b>Before the pandemic</b>                                |                          |            |                 |                           |            |                 |                     |
| Every day                                                 | 21                       | 11%        | ns              | 12                        | 6%         | ns              | *                   |
| More than once a week                                     | 48                       | 26%        | ***             | 49                        | 23%        | ***             | ns                  |
| Several times a month                                     | 52                       | 28%        | ***             | 65                        | 31%        | ***             | ns                  |
| Once a month                                              | 28                       | 15%        | ***             | 46                        | 22%        | *               | ns                  |
| Less than once a month                                    | 28                       | 15%        | ns              | 30                        | 14%        | ns              | ns                  |
| Never                                                     | 8                        | 4%         | ***             | 7                         | 3%         | ***             | ns                  |
| Total                                                     | 185                      | 100%       |                 | 209                       | 100%       |                 |                     |
| <b>During the pandemic</b>                                |                          |            |                 |                           |            |                 |                     |
| Every day                                                 | 8                        | 5%         |                 | 6                         | 3%         |                 | ns                  |
| More than once a week                                     | 15                       | 8%         |                 | 10                        | 5%         |                 | ns                  |
| Several times a month                                     | 17                       | 10%        |                 | 16                        | 8%         |                 | ns                  |
| Once a month                                              | 12                       | 33%        |                 | 24                        | 32%        |                 | ns                  |
| Less than once a month                                    | 58                       | 7%         |                 | 64                        | 12%        |                 | ns                  |
| Never                                                     | 67                       | 38%        |                 | 82                        | 41%        |                 | ns                  |
| Total                                                     | 137                      | 100%       |                 | 170                       | 100%       |                 |                     |
| <b>2) Reason to visit a public green space</b>            |                          |            |                 |                           |            |                 |                     |
| <b>Before the pandemic</b>                                |                          |            |                 |                           |            |                 |                     |
| Taking the kids outdoor                                   | 92                       | 31%        | *               | 93                        | 26%        | ***             | ns                  |
| Walking                                                   | 77                       | 26%        | ns              | 98                        | 27%        | ns              | ns                  |
| Meeting people                                            | 11                       | 4%         | **              | 23                        | 6%         | ns              | ns                  |
| Relaxing                                                  | 25                       | 8%         | *               | 27                        | 8%         | ns              | ns                  |
| Observing nature                                          | 50                       | 17%        | ns              | 60                        | 17%        | ns              | ns                  |
| Staying outdoors                                          | 17                       | 6%         | ns              | 15                        | 4%         | ***             | ns                  |
| Passing through while going somewhere else                | 13                       | 4%         | ***             | 22                        | 6%         | ns              | ns                  |
| Physical exercise (e.g. running, sport)                   | 16                       | 5%         | ns              | 15                        | 4%         | ns              | ns                  |
| Gardening                                                 | 0                        | 0%         | ns              | 3                         | 1%         | ns              | ns                  |
| Reading                                                   | 0                        | 0%         | ns              | 3                         | 1%         | ns              | ns                  |
| Total                                                     | 301                      | 100%       |                 | 359                       | 100%       |                 |                     |
| <b>During the pandemic</b>                                |                          |            |                 |                           |            |                 |                     |
| Taking the kids outdoor                                   | 36                       | 20%        |                 | 20                        | 10%        |                 | ***                 |
| Walking                                                   | 49                       | 28%        |                 | 56                        | 27%        |                 | ns                  |
| Meeting people                                            | 18                       | 10%        |                 | 20                        | 10%        |                 | ns                  |
| Relaxing                                                  | 6                        | 3%         |                 | 8                         | 4%         |                 | ns                  |
| Observing nature                                          | 22                       | 13%        |                 | 39                        | 19%        |                 | ns                  |
| Staying outdoors                                          | 14                       | 8%         |                 | 25                        | 12%        |                 | ns                  |
| Passing through while going somewhere else                | 22                       | 13%        |                 | 21                        | 10%        |                 | ns                  |
| Physical exercise (e.g. running; sport)                   | 8                        | 5%         |                 | 15                        | 7%         |                 | ns                  |
| Gardening                                                 | 0                        | 0%         |                 | 2                         | 1%         |                 | ns                  |
| Reading                                                   | 1                        | 1%         |                 | 0                         | 0%         |                 | ns                  |
| Total                                                     | 176                      | 100%       |                 | 206                       | 100%       |                 |                     |

The Chi Square goodness of fit test was used to compare the items between the two groups (with vs. without private green space) and Wilcoxon test was used for the comparisons between pre- and during pandemic at  $p < 0.05$ . Significant differences are showed with \* at  $p < 0.05$ ; \*\* at  $p < 0.01$ ; \*\*\* at  $p < 0.001$ ; ns for non-significant differences.

Table S9. Frequency of visitation of public green spaces in relation to variables connected to the demographic and the presence of private green spaces.

|                     | n=379                                                                 | b     | Std.Err. | p-value |
|---------------------|-----------------------------------------------------------------------|-------|----------|---------|
| Pre-pandemic        | Intercept                                                             | 2.67  | 0.36     | 0.00    |
|                     | Reason in public green space prior the pandemic - Passing through it  | -0.85 | 0.22     | 0.00    |
|                     | Student                                                               | -0.46 | 0.18     | 0.01    |
|                     | Distance of public green space                                        | 0.12  | 0.05     | 0.02    |
|                     | Reason in public green space prior the pandemic -Physical exercise    | 0.61  | 0.22     | 0.01    |
|                     | Reason in public green space prior the pandemic - Walking             | 0.31  | 0.13     | 0.01    |
| During the pandemic | Intercept                                                             | 1.76  | 0.29     | 0.00    |
|                     | Reason in public green space during the pandemic - Physical exercise  | 0.76  | 0.30     | 0.01    |
|                     | Reason in public green space during the pandemic - Passing through it | -0.52 | 0.24     | 0.03    |
|                     | Reason in public green space during the pandemic - Staying outdoors   | -0.54 | 0.24     | 0.03    |
|                     | Frequency of visitation of a private green space during the pandemic  | 0.1   | 0.05     | 0.04    |
|                     |                                                                       |       |          |         |

Table S10. Motivation (up to two choices) for visiting a public and private green space during the pandemic.

|                         | Public green space |            | Private green space |            | p   |
|-------------------------|--------------------|------------|---------------------|------------|-----|
|                         | Count              | Percentage | Count               | Percentage |     |
| Gardening               | 2                  | 1%         | 30                  | 6%         | *** |
| Meeting people          | 38                 | 10%        | 21                  | 4%         | *** |
| Observing nature        | 61                 | 16%        | 97                  | 19%        | ns  |
| Passing through it      | 43                 | 11%        | 37                  | 7%         | *   |
| Physical exercise       | 23                 | 6%         | 24                  | 5%         | ns  |
| Reading                 | 1                  | 0%         | 7                   | 1%         | ns  |
| Relaxing                | 14                 | 4%         | 82                  | 16%        | *** |
| Staying outdoors        | 39                 | 10%        | 76                  | 15%        | *   |
| Taking the kids outdoor | 56                 | 15%        | 97                  | 19%        | ns  |
| Walking                 | 105                | 27%        | 38                  | 7%         | *** |
| Total                   | 382                | 100%       | 510                 | 100%       |     |

The Chi Square goodness of fit test was used to test if the motivation was affected by the type of green space at  $p < 0.05$ . Significant differences are showed with \* at  $p < 0.05$ ; \*\* at  $p < 0.01$ ; \*\*\* at  $p < 0.001$ ; ns for non-significant differences.

Table S11. Aspects of private (left) and public (right) green space appreciated by respondents, in relationship to independent variables.

|                          | Private green space (n=209)                       |        |           |         | Public green space (n=231)       |        |           |         |
|--------------------------|---------------------------------------------------|--------|-----------|---------|----------------------------------|--------|-----------|---------|
|                          |                                                   | b      | Std. Err. | p-value |                                  | b      | Std. Err. | p-value |
| Natural value            | Intercept                                         | 3.278  | 0.263     | 0.000   | Intercept                        | 3.770  | 0.310     | 0.000   |
|                          | House                                             | 0.207  | 0.090     | 0.022   | Age                              | -0.096 | 0.039     | 0.015   |
|                          | Price of urban lands                              | -0.308 | 0.142     | 0.031   | Gender                           | -0.226 | 0.090     | 0.013   |
| Biodiversity             | Intercept                                         | 3.113  | 0.238     | 0.000   | Intercept                        | 3.685  | 0.322     | 0.000   |
|                          | Age                                               | -0.117 | 0.053     | 0.029   | Gender                           | -0.315 | 0.109     | 0.004   |
|                          | House                                             | 0.229  | 0.113     | 0.044   | Greenery class                   | -0.069 | 0.026     | 0.007   |
|                          | Price of urban lands                              | -0.417 | 0.170     | 0.014   | House                            | 0.221  | 0.107     | 0.040   |
| Cleanness                | Intercept                                         | 3.552  | 0.129     | 0.000   | Intercept                        | 4.086  | 0.160     | 0.000   |
|                          | House                                             | 0.309  | 0.106     | 0.004   | Gender                           | -0.369 | 0.087     | 0.000   |
| Quiet/freedom from noise | Intercept                                         | 2.158  | 0.293     | 0.000   | Age                              | -0.089 | 0.036     | 0.016   |
|                          | Education                                         | 0.244  | 0.070     | 0.001   |                                  |        |           |         |
|                          | Housewife                                         | 0.365  | 0.142     | 0.011   |                                  |        |           |         |
| Privacy                  | Intercept                                         | 2.801  | 0.247     | 0.000   | Intercept                        | 3.892  | 0.340     | 0.000   |
|                          | Having a private GS                               | 0.230  | 0.083     | 0.006   | Gender                           | -0.248 | 0.125     | 0.049   |
|                          | Education                                         | 0.141  | 0.059     | 0.018   | Education                        | -0.175 | 0.087     | 0.044   |
| Socialization            |                                                   |        |           |         | Intercept                        | 2.852  | 0.261     | 0.000   |
|                          |                                                   |        |           |         | Freq. of visitation of public GS | 0.109  | 0.047     | 0.022   |
|                          |                                                   |        |           |         | pre-pandemic Greenery class      | -0.066 | 0.029     | 0.024   |
| Security from bad people | Intercept                                         | 2.944  | 0.332     | 0.000   | Intercept                        | 3.172  | 0.384     | 0.000   |
|                          | Gender                                            | -0.302 | 0.113     | 0.008   | Gender                           | -0.434 | 0.116     | 0.000   |
|                          | Other (profession)                                | -0.474 | 0.177     | 0.008   | Education                        | 0.224  | 0.080     | 0.006   |
|                          | Free-lance                                        | -0.353 | 0.178     | 0.048   | Housewife                        | 0.472  | 0.196     | 0.017   |
|                          | Price of urban lands                              | -0.434 | 0.170     | 0.011   |                                  |        |           |         |
|                          | Preferred for residency                           | 0.423  | 0.178     | 0.018   |                                  |        |           |         |
| Safety from contagion    | Intercept                                         | 2.658  | 0.337     | 0.000   | Intercept                        | 3.747  | 0.141     | 0.000   |
|                          | Gender                                            | -0.514 | 0.108     | 0.000   | Gender                           | -0.390 | 0.110     | 0.000   |
|                          | Freq. of visitation of private GS during pandemic | 0.081  | 0.034     | 0.020   |                                  |        |           |         |

Multiple regression analysis between the dependent variables connected to appreciated benefits and services and independent variables, related to public green spaces and private green spaces as indicated in materials and methods. Only statistically significant results are reported.

Table S12. Missed things related to green spaces indicated by respondents (n=394).

|                          | Count | Percentage |
|--------------------------|-------|------------|
| Nature                   | 104   | 19%        |
| Meeting people           | 97    | 18%        |
| Family togetherness      | 54    | 10%        |
| Children's play          | 44    | 8%         |
| Walking                  | 41    | 8%         |
| Clean air                | 40    | 7%         |
| Relaxation               | 25    | 5%         |
| Quiet                    | 26    | 5%         |
| Enjoying the green space | 25    | 5%         |
| Physical exercise        | 21    | 4%         |
| Breathing in open air    | 21    | 4%         |
| Recreation               | 12    | 2%         |
| No stress for the virus  | 11    | 2%         |
| Everything               | 1     | 0%         |
| Nothing                  | 14    | 3%         |
| Total                    | 536   | 100%       |

Table S13. What was missed by respondents (n=394) in relation to demographic information and green space visitation before the pandemic.

|                   |                                                                   | b     | Std.Err. | p-value |
|-------------------|-------------------------------------------------------------------|-------|----------|---------|
| Nature            | Intercept                                                         | 0.36  | 0.04     | 0.000   |
|                   | Male                                                              | -0.13 | 0.05     | 0.009   |
| Clean air         | Intercept                                                         | 0.10  | 0.02     | 0.000   |
|                   | Student                                                           | 0.13  | 0.04     | 0.001   |
| Sociality         | Intercept                                                         | 0.12  | 0.15     | 0.432   |
|                   | Distance of public green space                                    | 0.05  | 0.02     | 0.010   |
|                   | Near tree lined-street                                            | 0.16  | 0.07     | 0.017   |
|                   | Greenery class                                                    | 0.03  | 0.01     | 0.036   |
|                   | Near square with trees                                            | 0.23  | 0.11     | 0.033   |
|                   | Male                                                              | 0.12  | 0.06     | 0.031   |
|                   | Age                                                               | -0.06 | 0.03     | 0.027   |
| Physical exercise | Intercept                                                         | -0.02 | 0.09     | 0.778   |
|                   | Age                                                               | 0.06  | 0.02     | 0.001   |
|                   | Other                                                             | 0.13  | 0.06     | 0.031   |
|                   | Student                                                           | 0.10  | 0.05     | 0.045   |
| Relax and quiet   | House                                                             | -0.10 | 0.03     | 0.006   |
| Recreation        | Intercept                                                         | 0.13  | 0.05     | 0.005   |
|                   | Education                                                         | -0.03 | 0.01     | 0.050   |
| Nothing           | Intercept                                                         | 0.28  | 0.06     | 0.000   |
|                   | Frequency of visitation of public green space before the pandemic | -0.02 | 0.01     | 0.001   |
|                   | Near square with trees                                            | 0.12  | 0.04     | 0.003   |
|                   | Distance of public green space                                    | -0.03 | 0.01     | 0.001   |
|                   | Age                                                               | 0.02  | 0.01     | 0.003   |



|           |       |      |       |
|-----------|-------|------|-------|
| Education | -0.03 | 0.01 | 0.016 |
| Near Park | -0.05 | 0.02 | 0.016 |

Multiple regression analysis between the dependent variables (what was missed) and independent variables. Only statistically significant results are reported.

### Survey: Use of green spaces during the pandemic by COVID-19 in Birjand

The present questionnaire has been designed with the aim of studying the relationship between Birjand citizens and urban green space in the Corona period. Researchers aim to compare the use of urban green spaces (public and private green spaces) by Birjand citizens in the two periods before and after Corona. In this study, urban public green space means all green spaces that are managed by the municipality or other government agencies (natural resources, cultural heritage) like urban parks and gardens that all people can use. Private green spaces refer to privately owned gardens and yards at level of private houses and condominiums.

The questionnaire should take approximately 15 minutes to complete.

The questionnaire is entirely anonymous. Personal data are requested for statistical purposes only, and the reporting of results will be based solely on aggregated data.

Thank you in advance for your cooperation.

#### I have read the handling data management information:

- ☐ Yes

### Section 1

#### Characteristics of the neighborhood and of the usage of green spaces

- 1 Name (or postcode) of your district/neighborhood?

.....

- 2 In which kind of house do you live?

- ☐ Flat in a condominium  
☐ Single house  
☐ Villa

- 3 Is there any PUBLIC green space in your neighborhood (within 300 m from home)? (If you select Other, please, specify)

- ☐ A tree-lined street  
☐ An urban park  
☐ A public urban garden  
☐ A square with trees  
☐ Neighborhood green space  
☐ Playground  
☐ River banks  
☐ Green area outside the town (e.g. forest)  
☐ Beach  
☐ Lake  
☐ Other  
☐ None

## Section 2A.

For the next questions, you can refer to such public green space or to another one; refer to your habits before the pandemic

4 How often (**in general**) did you use to visit a **public urban green space before the pandemic**?

- ☐ Every day
- ☐ More than once a week
- ☐ Several times a month
- ☐ Once a month
- ☐ Less than once a month
- ☐ Never (=> Q9)

5 How far did you use to travel to reach such **public urban green space before the pandemic**?

- ☐ Less than 300 m
- ☐ Between 300 and 500 m
- ☐ More than 500 m
- ☐ More than 1 km

6 What kind of green space is it? (If you select Other, please, specify)

- ☐ A tree-lined street
- ☐ An urban park
- ☐ A periurban forest
- ☐ A public garden
- ☐ A square with trees
- ☐ Neighborhood green pocket
- ☐ Playground
- ☐ River banks
- ☐ Beach
- ☐ Lake
- ☐ Other:

7 For which reason(s) did you usually visit the **public urban green space before the pandemic**? (max. 2 answers, the most important)

- ☐ Meeting people
- ☐ Physical exercise (e.g. running, sport)
- ☐ Walking
- ☐ Taking the kids outdoor
- ☐ Reading
- ☐ Observing nature
- ☐ Taking the dog out
- ☐ Relaxing
- ☐ Passing through while going somewhere else
- ☐ Staying outdoors
- ☐ Gardening
- ☐ Other:

8 What did you usually appreciated most in the **public urban green space before the pandemic**?

- ☐ Physical health benefits (weight, cardiovascular)
- ☐ Reduction of stress

- ☐ Reduction anxiety
- ☐ Reduction of depression
- ☐ Connection to nature
- ☐ Connection to spiritual side
- ☐ Appreciation of the environment
- ☐ Family togetherness
- ☐ Provision of clean air
- ☐ Sense of community

## Section 2B

### Use of private garden/courtyard/backyard in general, before the pandemic

- 9 Does your house/building include an accessible private garden/courtyard/backyard?
- ☐ Yes
  - ☐ No (=>Section 3)
- 10 How big is the private garden/courtyard/backyard?
- ☐ Less than 30 m<sup>2</sup>
  - ☐ Between 30 and 100 m<sup>2</sup>
  - ☐ More than 100 m<sup>2</sup>
- 11 Is it shared with other people?
- ☐ Yes, with the family
  - ☐ Yes, with the neighbors
  - ☐ No
- 12 How often do you spend time (meaningful for activities) in the private garden/courtyard/backyard?
- ☐ Everyday
  - ☐ More than once a week
  - ☐ Several times a month
  - ☐ Once a month
  - ☐ Less than once a month
  - ☐ Never
- 13 For which reason(s) do you usually spend time in the private garden/courtyard/backyard? (max. 2 answers, the most important)
- ☐ Meeting people
  - ☐ Physical exercise (e.g. running, sport)
  - ☐ Walking
  - ☐ Taking the kids outdoor
  - ☐ Reading
  - ☐ Observing nature
  - ☐ Taking the dog out
  - ☐ Relaxing
  - ☐ Passing through while going somewhere else
  - ☐ Staying outdoors
  - ☐ Gardening
  - ☐ Other:
- 14 What do you usually appreciate most in the private garden/courtyard/backyard?

- ☐ Physical health benefits (weight, cardiovascular)
- ☐ Reduction of stress
- ☐ Reduction anxiety
- ☐ Reduction in depression
- ☐ Connection to nature
- ☐ Connection to spiritual side
- ☐ Appreciation of the environment
- ☐ Family togetherness
- ☐ Provision of clean air
- ☐ Sense of community

### Section 3A

#### Use and perception of public urban green space during the pandemic

15 How many times have you been in a **public urban green space** (to the extent allowed) **during the pandemic?**

- ☐ Everyday
- ☐ More than once a week
- ☐ Several times a month
- ☐ Once a month
- ☐ Less than once a month
- ☐ **Never (=> Q20)**

16 For which reason(s) did you visit a **public urban green space during the pandemic?** (max. 2 answers, the most important)

- ☐ Meeting people
- ☐ Physical exercise (e.g. running, sport)
- ☐ Walking
- ☐ Taking the kids outdoor
- ☐ Reading
- ☐ Observing nature
- ☐ Taking the dog out
- ☐ Relaxing
- ☐ Passing through while going somewhere else
- ☐ Staying outdoors
- ☐ Gardening
- ☐ Other:

17 What do you usually appreciate most in a **public urban green space during the pandemic?**

- ☐ Physical health benefits (weight, cardiovascular)
- ☐ Reduction of stress
- ☐ Reduction anxiety
- ☐ Reduction in depression
- ☐ Connection to nature
- ☐ Connection to spiritual side
- ☐ Appreciation of the environment
- ☐ Family togetherness
- ☐ Provision of clean air
- ☐ Sense of community

18 What feeling change did you notice staying in the **public urban green space with respect to staying home during the pandemic?**

|                      | Much less | Less | No change | More | Much more |
|----------------------|-----------|------|-----------|------|-----------|
| Happy                |           |      |           |      |           |
| Pleased              |           |      |           |      |           |
| Excited (ecstatic)   |           |      |           |      |           |
| Physically energetic |           |      |           |      |           |
| Anxious              |           |      |           |      |           |
| Nervous              |           |      |           |      |           |
| Tense                |           |      |           |      |           |
| Frightened           |           |      |           |      |           |
| Irritated            |           |      |           |      |           |
| Upset                |           |      |           |      |           |
| Depressed            |           |      |           |      |           |
| Blue                 |           |      |           |      |           |

Additional notes/explanations:

.....

19 Indicate, to which extent you appreciate the following items in such a **public urban green space during the pandemic**

|                                       | Not at all | Little | Appreciated | Very much |
|---------------------------------------|------------|--------|-------------|-----------|
| Quiet/freedom from noise              |            |        |             |           |
| Privacy                               |            |        |             |           |
| Socialization                         |            |        |             |           |
| Safety from contagion                 |            |        |             |           |
| Security from bad people              |            |        |             |           |
| Cleanness                             |            |        |             |           |
| Natural value                         |            |        |             |           |
| Biodiversity (for plants and animals) |            |        |             |           |
| Clean air                             |            |        |             |           |
| Comfortable climate                   |            |        |             |           |
| Vicinity                              |            |        |             |           |
|                                       |            |        |             |           |

### Section 3B

#### Use and perception of private green spaces during the pandemic

20 How many times have you been in a **private garden/courtyard/backyard during the pandemic?**

- ☐ Everyday
- ☐ More than once a week
- ☐ Several times a month
- ☐ Once a month
- ☐ Less than once a month
- ☐ Never (=> Q25)

21 For which reason(s) did you visit the **private garden/courtyard/backyard during the pandemic?** (max. 2 answers, the most important)

- ☐ Meeting people
- ☐ Physical exercise (e.g. running, sport)
- ☐ Walking
- ☐ Taking the kids outdoor
- ☐ Reading
- ☐ Observing nature
- ☐ Taking the dog out
- ☐ Relaxing
- ☐ Passing through while going somewhere else
- ☐ Staying outdoors
- ☐ Gardening
- ☐ Other:

22 What did you enjoy most in the **private garden/courtyard/backyard during the pandemic?**

- ☐ Physical health benefits (weight, cardiovascular)
- ☐ Reduction of stress
- ☐ Reduction anxiety
- ☐ Reduction in depression
- ☐ Connection to nature
- ☐ Connection to spiritual side
- ☐ Appreciation of the environment
- ☐ Family togetherness
- ☐ Provision of clean air
- ☐ Sense of community

23 What feeling did you notice staying in the **private garden/courtyard/backyard with respect to staying home during the pandemic?**

|                      | Much less | Less | No change | More | Much more |
|----------------------|-----------|------|-----------|------|-----------|
| Happy                |           |      |           |      |           |
| Pleased              |           |      |           |      |           |
| Excited (ecstatic)   |           |      |           |      |           |
| Physically energetic |           |      |           |      |           |
| Anxious              |           |      |           |      |           |
| Nervous              |           |      |           |      |           |
| Tense                |           |      |           |      |           |
| Frightened           |           |      |           |      |           |
| Irritated            |           |      |           |      |           |
| Upset                |           |      |           |      |           |
| Depressed            |           |      |           |      |           |
| Blue                 |           |      |           |      |           |

Additional notes/explanations:

.....

24 Indicate the extent to which you **appreciated** the following items in the **private garden/courtyard/backyard during the pandemic**

|                          | Not at all | Little | Appreciated | Very much |
|--------------------------|------------|--------|-------------|-----------|
| Quiet/freedom from noise |            |        |             |           |
| Privacy                  |            |        |             |           |

|                                       |  |  |  |  |
|---------------------------------------|--|--|--|--|
| Socialization                         |  |  |  |  |
| Safety from contagion                 |  |  |  |  |
| Security from bad people              |  |  |  |  |
| Cleanness                             |  |  |  |  |
| Natural value                         |  |  |  |  |
| Biodiversity (for plants and animals) |  |  |  |  |
| Clean air                             |  |  |  |  |
| Comfortable climate                   |  |  |  |  |
| Vicinity                              |  |  |  |  |
|                                       |  |  |  |  |

Notes ...

#### Section 4

##### Missing a green space

25. During the period of lockdown, how much did you miss going to a green space?

- ☐ Not at all
- ☐ A little
- ☐ Rather
- ☐ A lot

26. What did you miss most during the lockdown regarding the visitation of green spaces?

.....

#### Section 5

##### Personal details (anonymous)

The questionnaire is anonymous. We would just like to know about the composition of our sample.

27. Gender

- ☐ M
- ☐ F
- ☐ Other

28. Age

- ☐ Less than 20 years old
- ☐ Between 20 and 29
- ☐ Between 30 and 39
- ☐ Between 40 and 49
- ☐ Between 50 and 59
- ☐ Between 60 and 69
- ☐ Between 70 and 79
- ☐ Above 80

29. Education

- ☐ Mandatory education
- ☐ High school diploma
- ☐ University/college degree

- ☐ Post-graduate degree

30. Employment

- ☐ Employee (public / private)
- ☐ Free-lance, private business
- ☐ Retired
- ☐ Unemployed
- ☐ Student
- ☐ Housewife
- ☐ Other
